# Supplementary material for: A Novel Turn-On Fluorescent Sensor Based on Sulfur Quantum Dots and MnO2 Nanosheet Architectures for Detection of Hydrazine
Source: MDPI journal article supplement (doi:10.3390/nano12132207), 2022-06-27
Supplement: s1 [file s1]

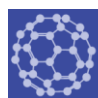

## Supplementary Materials

# A Novel Turn-On Fluorescent Sensor Based on Sulfur Quantum Dots and MnO<sub>2</sub> Nanosheet Architectures for Detection of Hydrazine

Xin Li <sup>1</sup>, Xiaobin Wang <sup>1</sup>, Wei Guo <sup>2,\*</sup>, Feng Luan <sup>1</sup>, Chunyuan Tian <sup>1</sup>, Xuming Zhuang <sup>1,\*</sup>, Lijun Zhao <sup>1,\*</sup>

<sup>1</sup> College of Chemistry and Chemical Engineering, Yantai University, Yantai 264005, China; lixinxin970519@163.com (X.L.); w1428566822@163.com (X.W.); luanf@ytu.edu.cn (F.L.); cytian@ytu.edu.cn (C.T.)

<sup>2</sup> Shandong Dyne Marine Biopharmaceutical Co., Ltd., Weihai 264300, China

\* Correspondence: guodawei0298@163.com (W.G.); xmzhuang@iccas.ac.cn (X.Z.); zhaoljyt@ytu.edu.cn (L.Z.)

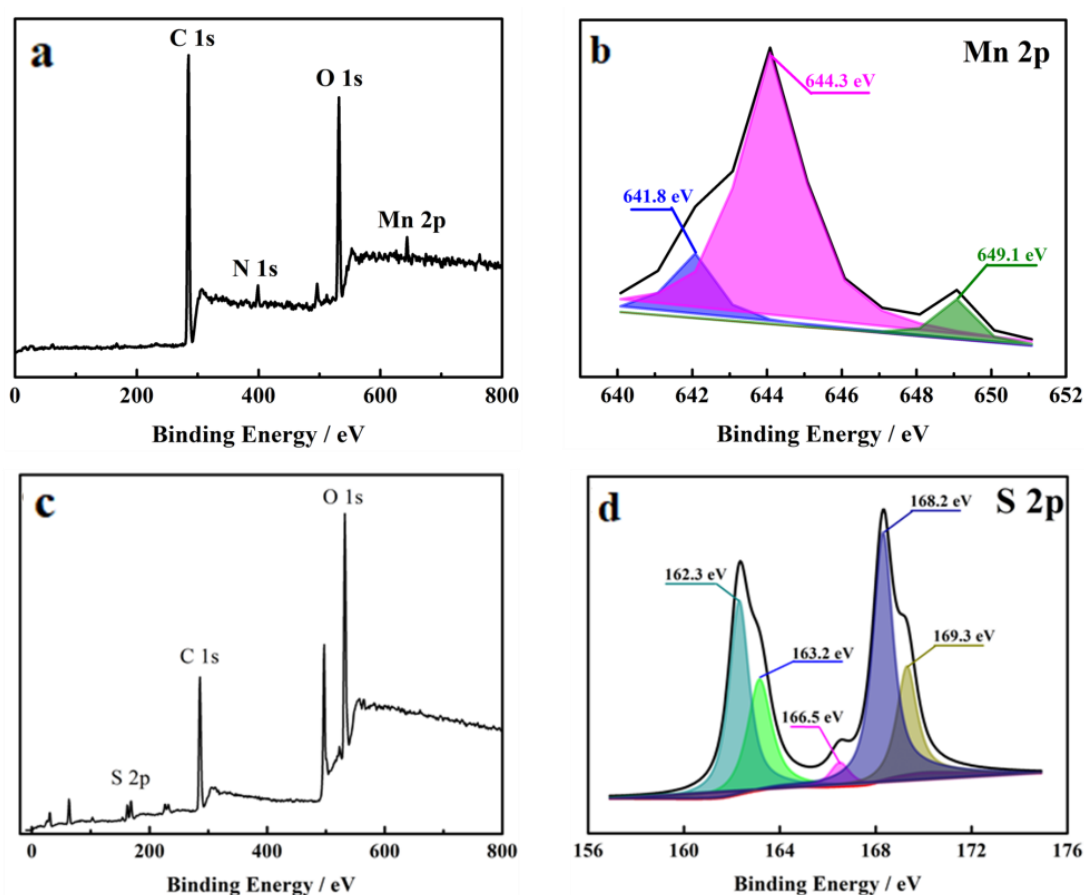

**Figure S1.** (a) XPS survey spectrum and (b) high-resolution Mn 2p XPS spectrum of MnO<sub>2</sub> NS. (c) XPS survey spectrum and (d) high-resolution S 2p XPS spectrum of SQDs.

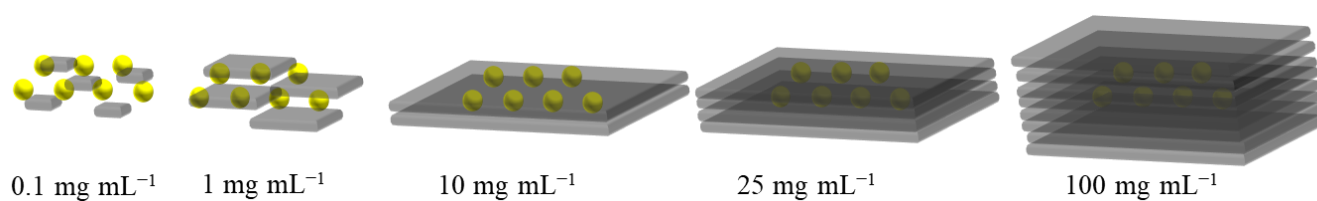

**Figure S2.** The quenching behavior of SQDs@MnO<sub>2</sub> about the concentrations of MnO<sub>2</sub> NS.
